# Supplementary material for: TGFβ-induced long non-coding RNA LINC00313 activates Wnt signaling and promotes cholangiocarcinoma
Source: Springer Nature journal article supplement (doi:10.1038/s44319-024-00075-z), 2024-02-08
Supplement: MOESM1 [file 44319_2024_75_moesm1_esm.pdf]

# TGFβ-induced long non-coding RNA *LINC00313* activates Wnt signalling and promotes cholangiocarcinoma

Panagiotis Papoutsoglou<sup>1,2</sup>, Raphaël Pineau<sup>1</sup>, Raffaele Leroux<sup>1</sup>, Corentin Louis<sup>1</sup>, Anaïs L'Haridon<sup>1</sup>, Dominika Foretek<sup>2</sup>, Antonin Morillon<sup>2</sup>, Jesus M. Banales<sup>3,4</sup>, David Gilot<sup>1</sup>, Marc Aubry<sup>1</sup> and Cédric Coulouarn<sup>1\*</sup>

## Table of content

|                                                                                                                        |    |
|------------------------------------------------------------------------------------------------------------------------|----|
| Appendix Figure S1. <i>LINC00313</i> is induced by TGFβ signalling in TGFβ-responsive CCA cell lines. ....             | 3  |
| Appendix Figure S2. Efficiency of SMAD silencing at mRNA and protein levels. ....                                      | 5  |
| Appendix Figure S3. Gene expression profiling after <i>LINC00313</i> loss of function. ....                            | 7  |
| Appendix Figure S4. Specificity of <i>LINC00313</i> silencing in CCA cell lines. 9                                     |    |
| Appendix Figure S5. <i>LINC00313</i> does not cause global alterations on chromatin accessibility. ....                | 11 |
| .....                                                                                                                  | 12 |
| Appendix Figure S6. <i>LINC00313</i> affects HuCCT1 cell proliferation, migration and invasion. ....                   | 13 |
| Appendix Figure S7. Impact of <i>LINC00313</i> on tumor growth and metastasis in a xenograft CCA mouse model. ....     | 15 |
| Appendix Figure S8. The SWI/SNF complex catalytic subunit BRG1 regulates specific <i>LINC00313</i> -target genes. .... | 17 |
| Appendix Figure S9. Prediction of miRNAs that commonly target <i>LINC00313</i> and TCF7. ....                          | 18 |
| Appendix Table S1. List of siRNAs.....                                                                                 | 19 |
| Appendix Table S2. List of DNA oligonucleotides (F: forward; R: reverse) .....                                         | 20 |
| Appendix Table S3. List of primary antibodies.....                                                                     | 23 |

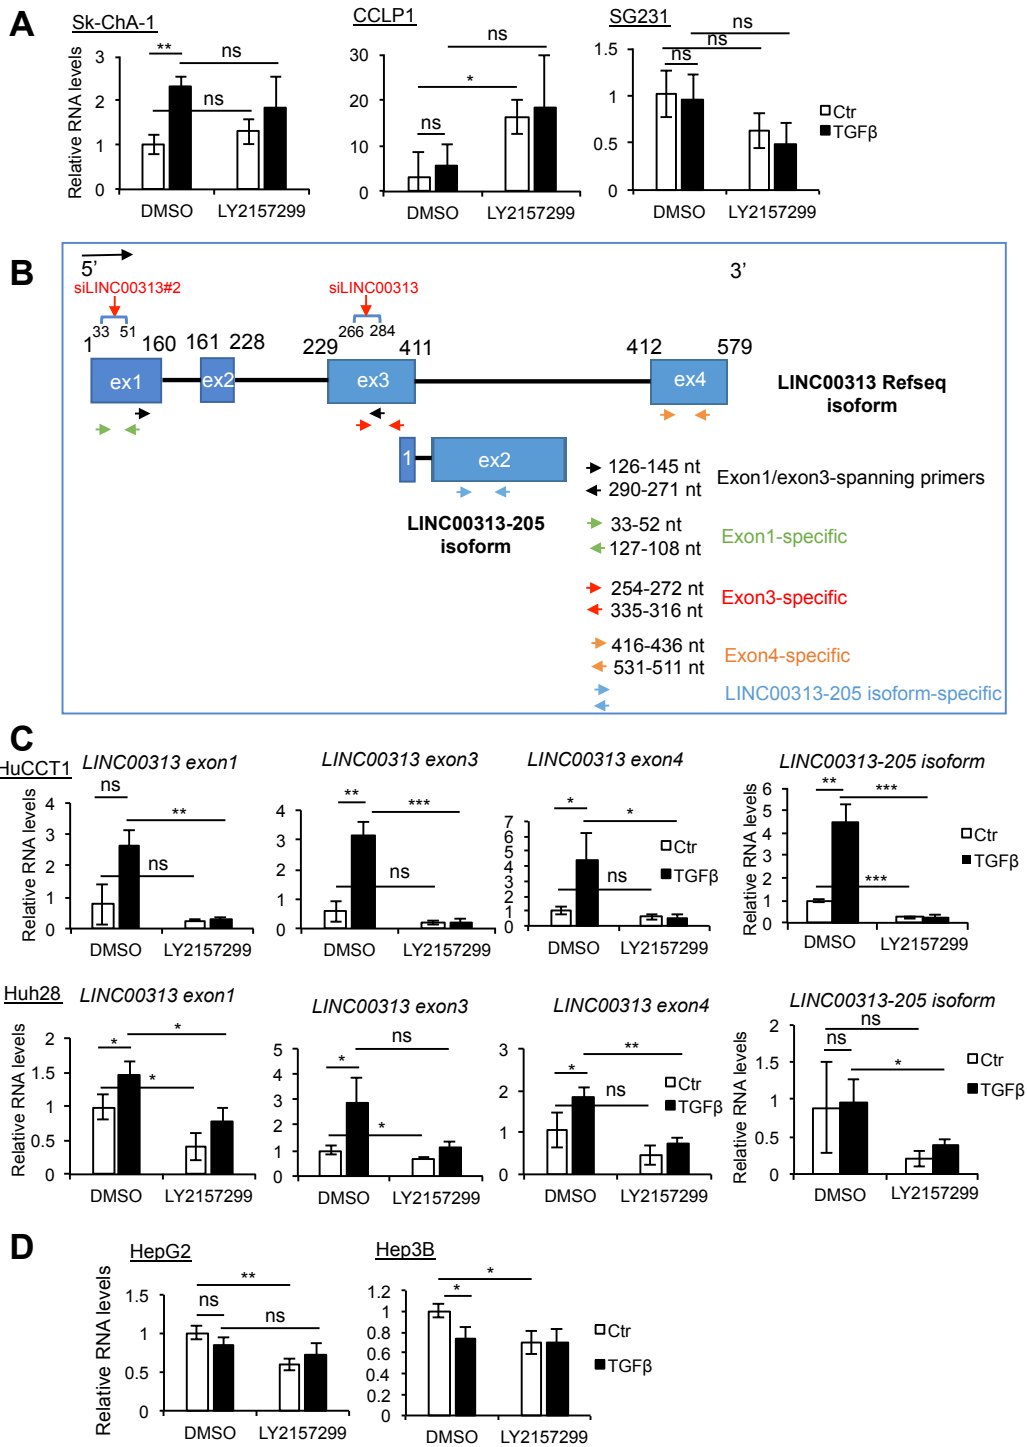

Appendix Figure S1

**Appendix Figure S1. *LINC00313* is induced by TGF $\beta$  signalling in TGF $\beta$ -responsive CCA cell lines.**

A) Real-time qPCR for detection of *LINC00313* in eCCA cell line Sk-ChA-1 and in iCCA cell lines CCLP1, SG231 treated with the T $\beta$ RI inhibitor LY2157299 or DMSO, and stimulated with TGF $\beta$ 1 or BSA/HCl for 16h. B) Scheme showing the exonic regions of the RefSeq *LINC00313* transcript, amplified by qPCR, using specific primer pairs. The regions targeted by the two individual siRNAs in exons 1 and 3 are also indicated. C) Real-time qPCR for detection of *LINC00313* specific exonic regions in HuCCT1 or Huh28 cells treated with the T $\beta$  RI inhibitor LY2157299 or DMSO, and stimulated with TGF  $\beta$  1 or BSA/HCl for 16h. D) Real-time qPCR to detect *LINC00313* expression in HCC cell lines HepG2 and Hep3B treated as in panel A.

Data information: In panels A, C and D data are presented as mean  $\pm$  SD (n=3 biological experiments). \*P $\leq$ 0.05, \*\*P $\leq$ 0.01, \*\*\*P $\leq$ 0.001, n.s.: not significant (Student's t-test).

**A**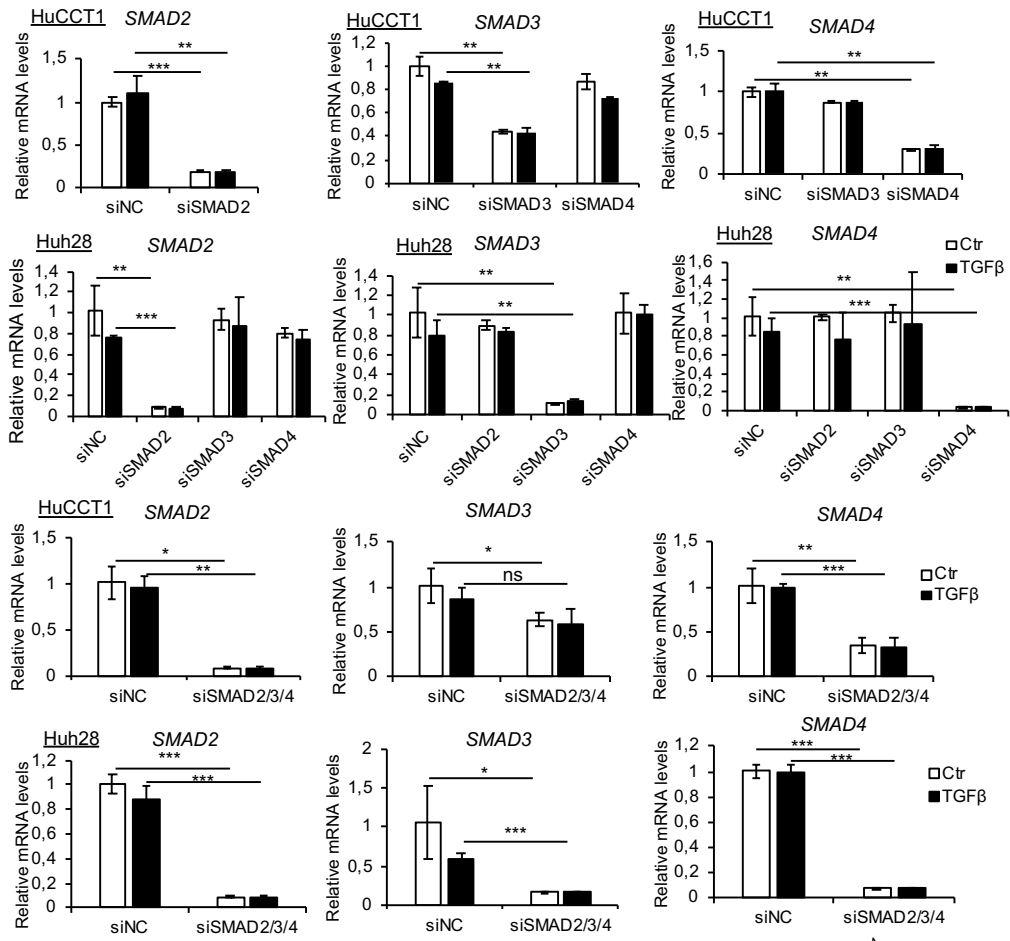**B**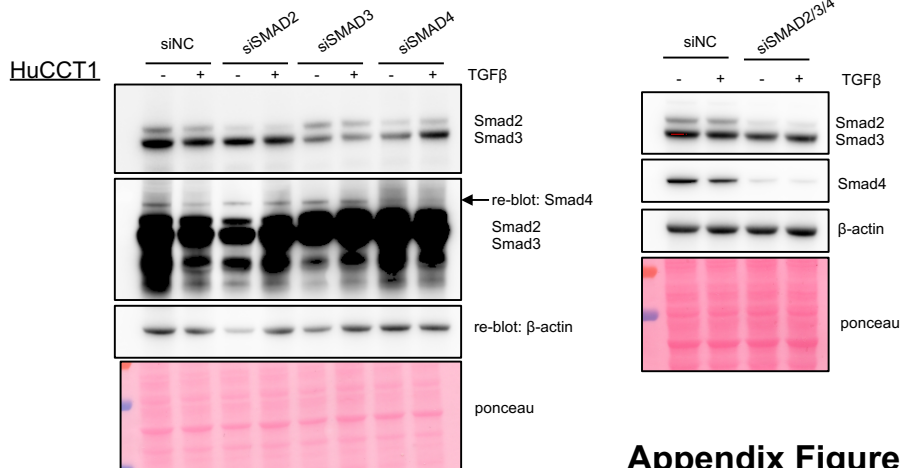**Appendix Figure S2**

**Appendix Figure S2. Efficiency of SMAD silencing at mRNA and protein levels.**

A) Real-time qPCR to measure SMAD2, SMAD3 and SMAD4 mRNA levels in HuCCT1 and Huh28 cell lines transiently transfected with siRNAs targeting individual SMAD2 or SMAD3 or SMAD4 or simultaneously all three SMADs or a non-targeting siRNA (siNC) and stimulated with TGF $\beta$ 1 or BSA/HCl for 16h. B) Immunoblotting measuring SMAD2, SMAD3, SMAD4 and  $\beta$ -actin protein levels in HuCCT1 cells transiently transfected with siRNAs targeting SMAD2 or SMAD3 or SMAD4 or simultaneously SMAD2/3/4 and in the presence or not of TGF $\beta$  or BSA/HCl for 16h. Ponceau staining of the same blots is also shown.

Data information: In panels A data are presented as mean  $\pm$  SD (n=3 biological experiments). \*P $\leq$ 0.05, \*\*P $\leq$ 0.01, \*\*\*P $\leq$ 0.001, n.s.: not significant (Student's t-test). In panel B the experiment was performed twice (n=2 biological experiments and the data of one replicate are shown).

**A**  $FC \geq 2$ ,  $p\text{-value} < 0.001$

| Ctr group        | Exp. group              | Probes Up | Probes Down |
|------------------|-------------------------|-----------|-------------|
| siNC             | siNC+TGF $\beta$        | 575       | 699         |
| siNC             | siLINC00313             | 44        | 116         |
| siNC+TGF $\beta$ | siLINC00313+TGF $\beta$ | 24        | 78          |

**B**

**GO Biological Process (siNC vs siNC+TGF $\beta$ , 446 Up-regulated genes)**

| GO term                                           | p-value   | Adjusted p-value |
|---------------------------------------------------|-----------|------------------|
| regulation of cell migration (GO:0030334)         | 1.508e-16 | 7.696e-13        |
| extracellular matrix organization (GO:0030198)    | 8.060e-16 | 2.056e-12        |
| positive regulation of cell motility (GO:2000147) | 9.283e-11 | 1.579e-7         |

**GO Biological Process (siNC vs siNC+TGF $\beta$ , 591 Down-regulated genes)**

| GO term                                                        | p-value   | Adjusted p-value |
|----------------------------------------------------------------|-----------|------------------|
| DNA replication (GO:0006260)                                   | 6.804e-34 | 3.472e-30        |
| DNA strand elongation involved in DNA replication (GO:0006271) | 3.213e-12 | 1.491e-9         |
| DNA biosynthetic process (GO:0071897)                          | 2.220e-16 | 1.416e-13        |

**C** KEGG pathway analysis (siNC vs siLINC, 37 Up genes)

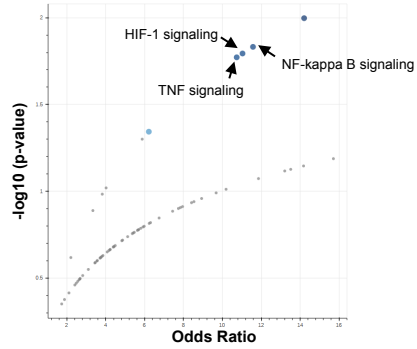

KEGG pathway analysis (siNC vs siLINC, Down genes)

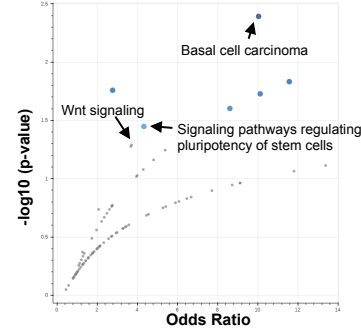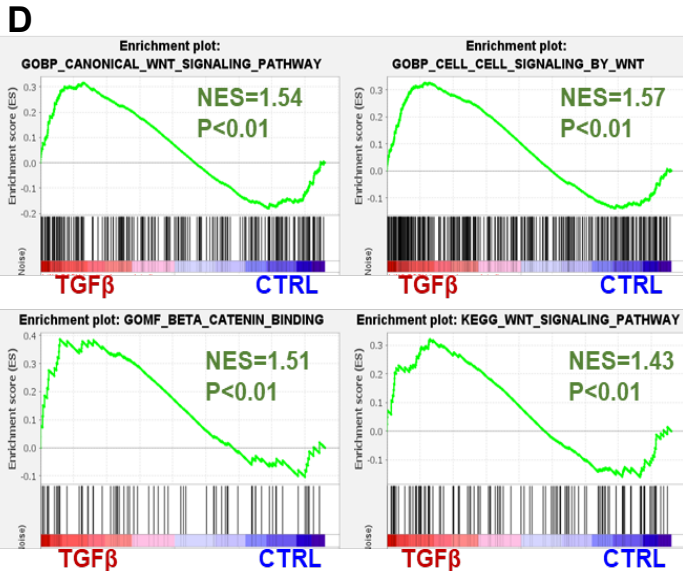

**E** GOBP\_CANONICAL\_WNT\_SIGNALING\_PATHWAY

| SYMBOL | ES     | CORE ENRICHMENT |
|--------|--------|-----------------|
| NOG    | 0.0120 | Yes             |
| TCF7   | 0.0242 | Yes             |
| COL1A1 | 0.0354 | Yes             |
| FERMT1 | 0.0467 | Yes             |
| JUP    | 0.0575 | Yes             |
| RBPJ   | 0.0664 | Yes             |
| SDC1   | 0.0785 | Yes             |
| WNT11  | 0.0833 | Yes             |
| WNT5B  | 0.0956 | Yes             |
| TMEM88 | 0.1033 | Yes             |
| GSK3B  | 0.1103 | Yes             |
| WNT7A  | 0.1198 | Yes             |

Appendix Figure S3

**Appendix Figure S3. Gene expression profiling after *LINC00313* loss of function.**

A) Number of differentially expressed genes in HuCCT1 cells transiently transfected with an individual siRNA targeting *LINC00313* or a non-targeting siRNA (siNC) and stimulated with TGF $\beta$ 1 or not for 16h. B) Gene ontology analysis of the 446 upregulated and 591 down-regulated genes, in response to TGF $\beta$ 1 stimulation. The top four statistically significant GO terms, related to biological process, are shown in the table, together with p-value and adjusted p-value for each GO term. C) KEGG pathway analysis of differentially up- or down-regulated genes in response to *LINC00313* silencing in HuCCT1 cells. D) GSEA of curated Wnt signaling pathway signatures (from MSigDB) in the gene expression profiles of HuCCT1 cells treated with TGF $\beta$  versus control (NES, normalized enrichment score; P<0.01). E) Core enrichment genes for the GOBP\_CANONICAL\_WNT\_SIGNALING\_PATHWAY signature.

Data information: In panels B and C, GO and KEGG analyses were performed using EnrichR. The p-value is computed using a standard statistical method used by most enrichment analysis tools: Fisher's exact test or the hypergeometric test. The adjusted p-value is calculated using the Benjamini-Hochberg method for correction for multiple hypotheses testing. The odds Ratio is computed using this formula:  $oddsRatio = (1.0 * a * d) / \text{Math.max}(1.0 * b * c, 1)$  where: a are the overlapping genes, b are the genes in the annotated set - overlapping genes, c- are the genes in the input set - overlapping genes, and d- are the 20,000 genes (or total genes in the background) - genes in the annotated set - genes in the input set + overlapping genes. In panels D and E

GSEA analysis results are displayed as a normalized enrichment score (NES) and presented as an enrichment plot. The Kolmogorov-Smirnov test was used for statistical analysis.

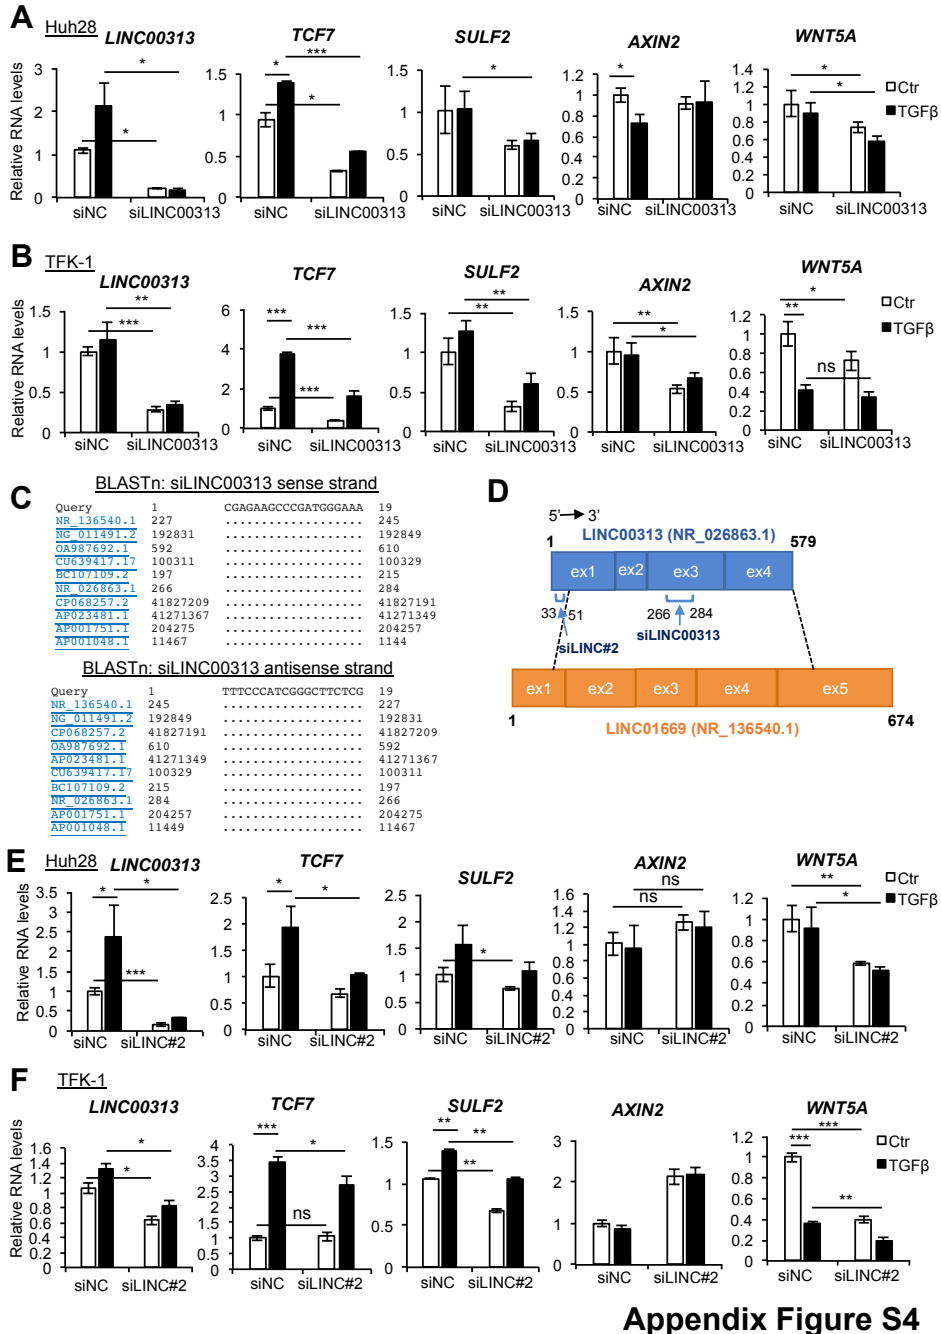



**Appendix Figure S4. Specificity of *LINC00313* silencing in CCA cell lines.**

A-B) Real-time qPCR analysis of *LINC00313*, *TCF7*, *SULF2*, *AXIN2* and *WNT5A* expression in A) Huh28 and B) TFK-1 cells, transiently transfected with an individual siRNA targeting *LINC00313* (si*LINC00313*) or a non-targeting siRNA (siNC) and stimulated or not with TGF  $\beta$  1 for 16h. C) Nucleotide BLAST results showing top targets of the sense and antisense strands of the siRNA against *LINC00313*. D) Scheme representing the region shared between *LINC00313* and *LINC01669*, as well as the regions targeted by the two individual siRNAs against *LINC00313*. E-F) Real-time qPCR analysis of *LINC00313*, *TCF7*, *SULF2*, *AXIN2* and *WNT5A* expression in D) Huh28 and E) TFK-1 cells, transiently transfected with a second individual siRNA targeting *LINC00313* (si*LINC#2*) or a non-targeting siRNA (siNC) and stimulated or not with TGF  $\beta$  1 for 16h.

Data information: In panels A, B, E and F data are presented as mean  $\pm$  SD (n=3 biological experiments). \*P $\leq$ 0.05, \*\*P $\leq$ 0.01, \*\*\*P $\leq$ 0.001, n.s.: not significant (Student's t-test).

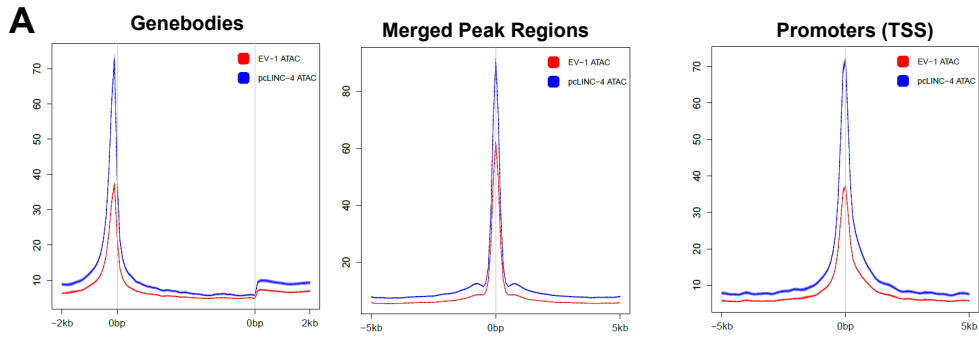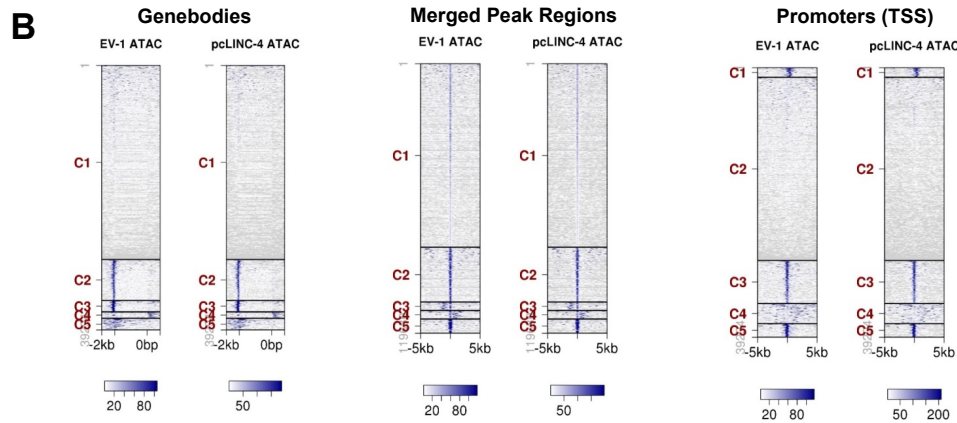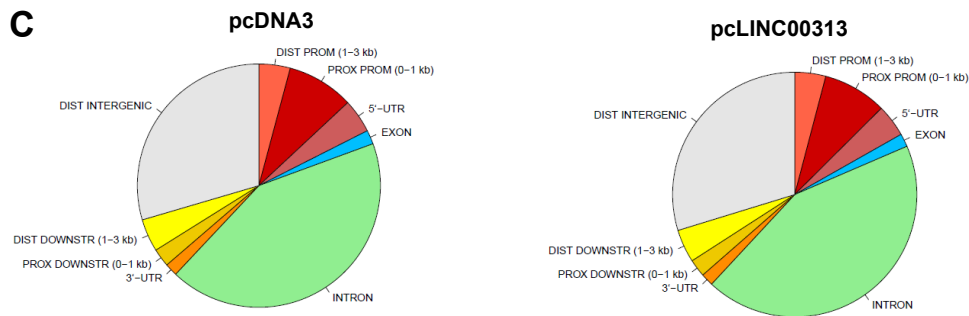

**D** HOMER de novo motif analysis  
Regions with increased peak signal in pcLINC00313

|    | Motif | p-value | % of targets | TF          |
|----|-------|---------|--------------|-------------|
| 1. |       | 1e-186  | 25.24%       | Fra1        |
| 2. |       | 1e-45   | 11.35%       | TEAD1       |
| 3. |       | 1e-38   | 20.73%       | KLF5        |
| 4. |       | 1e-37   | 9.38%        | NFY (CCAAT) |
| 5. |       | 1e-20   | 10.33%       | Foxo1       |
| 6. |       | 1e-16   | 39.71%       | RUNX2       |

HOMER de novo motif analysis  
Regions with decreased peak signal in pcLINC00313

|    | Motif | p-value | % of targets | TF        |
|----|-------|---------|--------------|-----------|
| 1. |       | 1e-230  | 32.37%       | Fra1      |
| 2. |       | 1e-38   | 30.85%       | ERG (ETS) |
| 3. |       | 1e-37   | 11.18%       | RUNX      |
| 4. |       | 1e-35   | 15.04%       | TEAD      |
| 5. |       | 1e-32   | 13.87%       | Gata4     |
| 6. |       | 1e-24   | 18.36%       | KLF4      |

**Appendix Figure S5**

**Appendix Figure S5. *LINC00313* does not cause global alterations on chromatin accessibility.**

A-B) Tag distributions across target regions such as Merged Regions (= all peak regions; +/- 5 kb), transcription start sites (TSS; +/- 5 kb) or gene bodies (with 2 kb flanking regions) are presented as average plots (A) and as heatmaps (B). C) Piecharts displaying the location of ATAC-seq peaks relative to genomic annotations. Several peaks are assigned to more than one feature. D) HOMER-based analysis of transcription factor binding motifs in chromatin regions with increased or decreased peak signal after *LINC00313* over-expression. The top 6 most significant consensus motifs, together with the percentage of target regions that are assigned to, are depicted.

Data information: In panel B for the heatmaps the data is clustered using k-means algorithm (default=5 clusters indicated by C1-C5) and sorted by decreasing average values inside each cluster. The graphics of panels A and B were generated with the Seqplots Bioconductor R package using the commands `plotAverage()` and `plotHeatmap()`. In panel D, HOMER analysis was performed on the 200 bp sequence centered around the midpoint of the differential region (+100 bp, -100 bp).

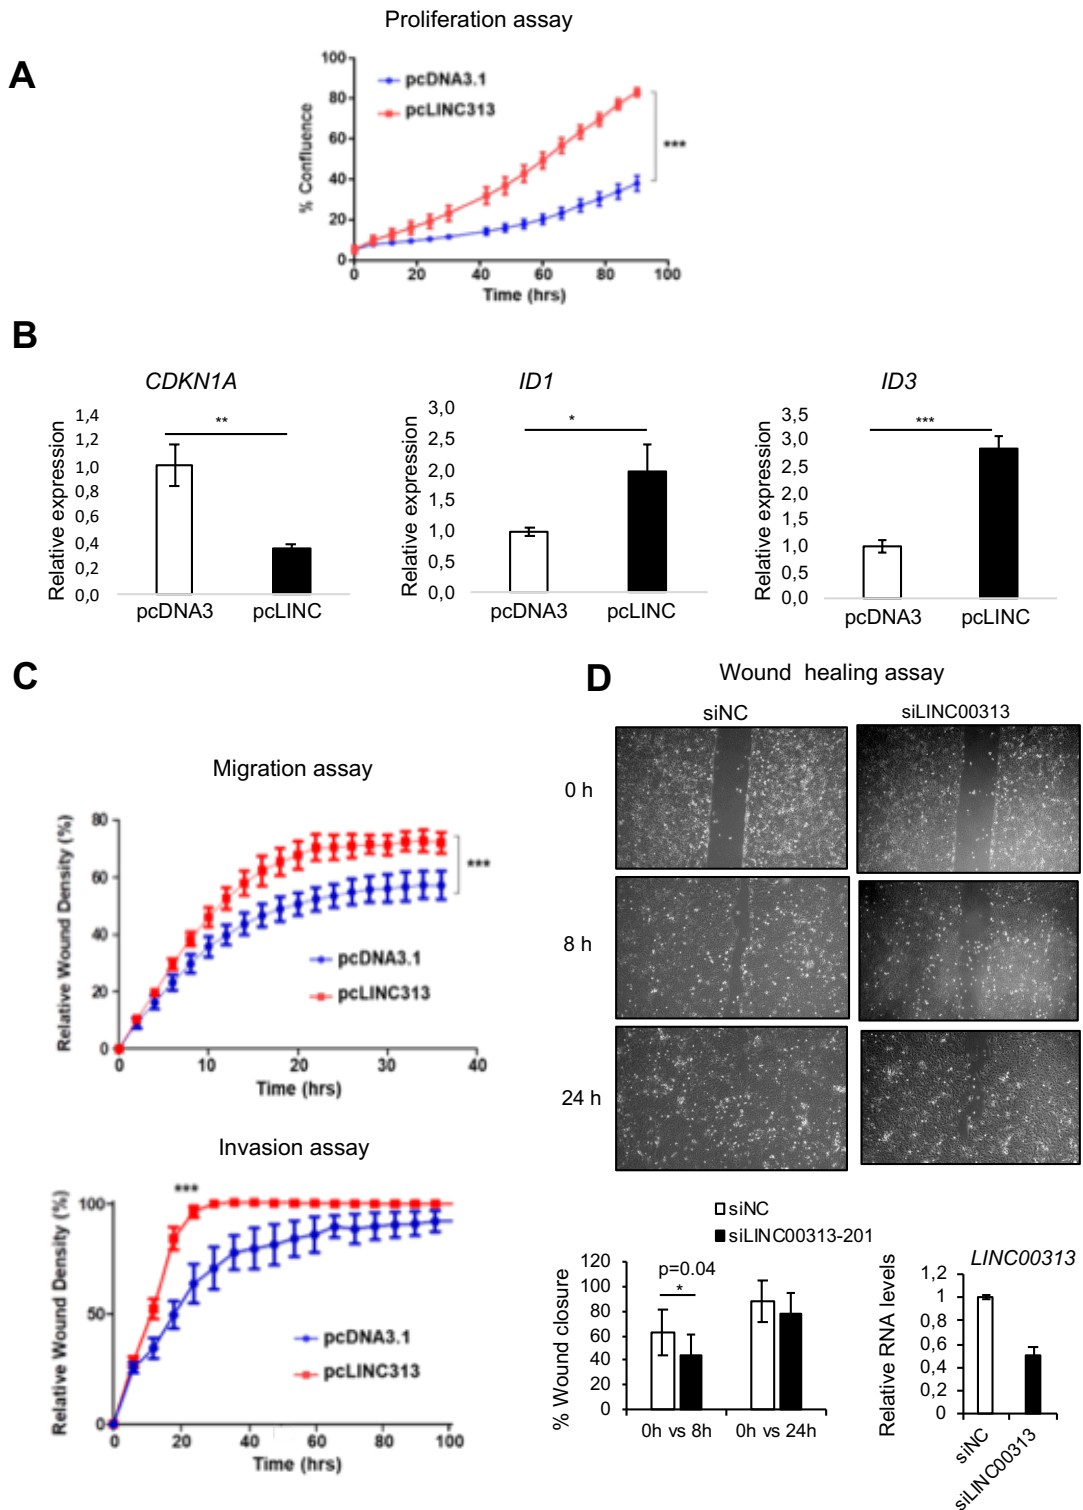

**Appendix Figure S6**

**Appendix Figure S6. *LINC00313* affects HuCCT1 cell proliferation, migration and invasion.**

A) Cell proliferation assay in control or LINC00313 stably over-expressing HuCCT1 cells, using Incucyte. B) Real-time qPCR analysis of *CDKN1A*, *ID1* and *ID3* mRNA in control or LINC00313 stably over-expressing HuCCT1 cells. C) Cell migration and invasion assays in control or LINC00313 stably over-expressing HuCCT1 cells, using Incucyte. D) Wound healing assay in HuCCT1 cells, transiently transfected with an individual siRNA targeting LINC00313 or a non-targeting siRNA (siNC) and in pcDNA3 and pcLINC00313 over-expressing cells. Quantification of migration is shown as percentage of wound closure after 8h and 24h since the scratch was performed. Real-time qPCR analysis of LINC00313 to quantify the efficiency of LINC00313 silencing is also shown.

Data information: In panel A, B, C and D data are presented as mean  $\pm$  SD (n=3 biological experiments). \*P $\leq$ 0.05, \*\*P $\leq$ 0.01, \*\*\*P $\leq$ 0.001 (Student's t-test).

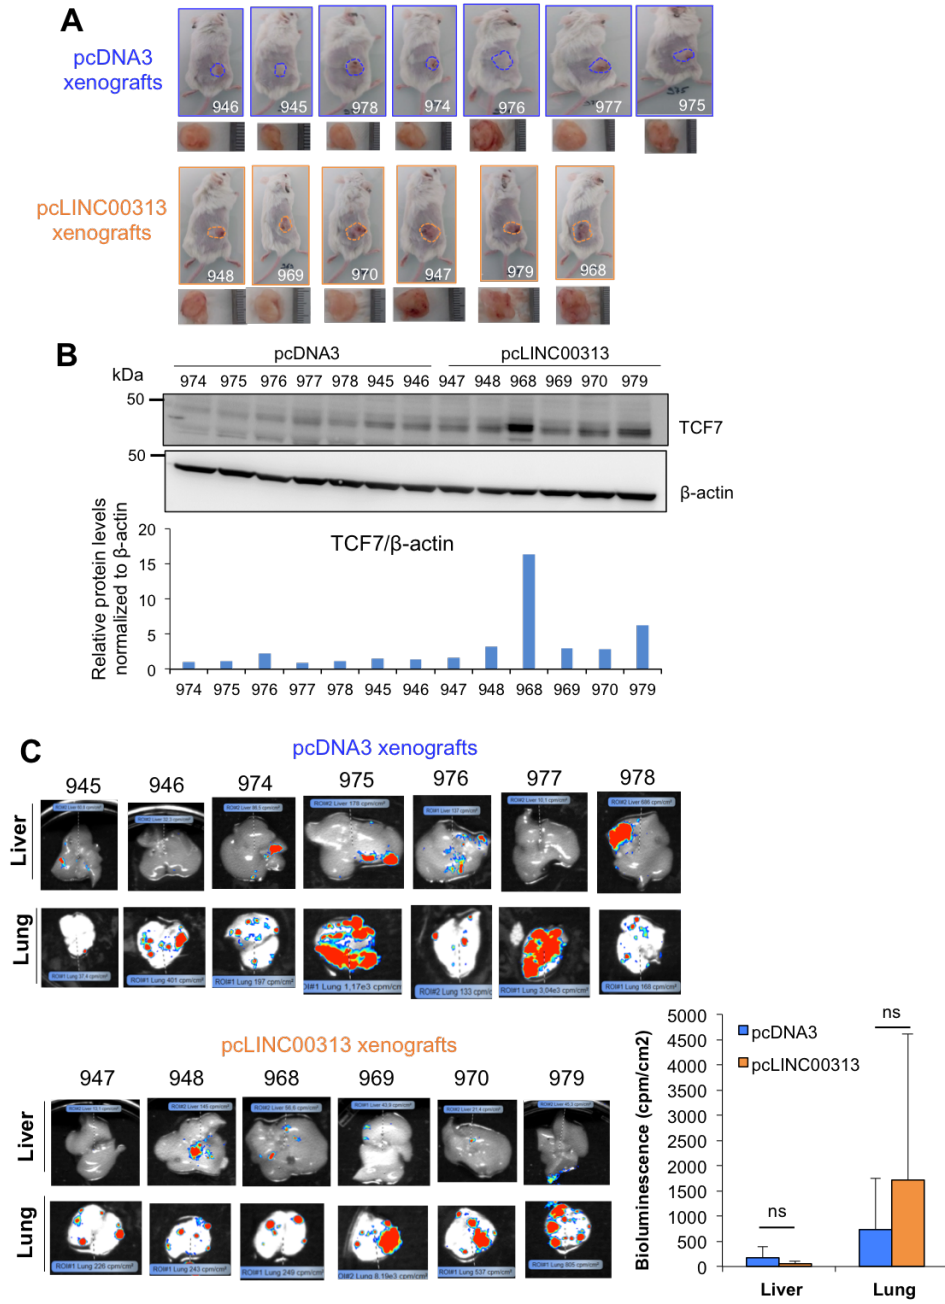

Appendix Figure S7

**Appendix Figure S7. Impact of LINC00313 on tumor growth and metastasis in a xenograft CCA mouse model.**

A) Picture of the mice and the corresponding resected tumours, used for analyzing tumor growth and metastasis and gene expression profiling (pcDNA3, n=7 and pcLINC00313, n=6). B) Immunoblotting for detection of TCF7 and  $\beta$ -actin protein levels using total protein extracts from the resected tumours as described in panel A. Quantification of the intensity of the TCF7 protein levels, normalized to  $\beta$ -actin levels is also shown. C) Pictures showing the presence of metastases in resected livers and lungs of the same mice. Bioluminescent signal expressed as cpm/cm<sup>2</sup>, derived from HuCCT1 cells expressing luciferase, indicates the sites of metastases. Quantification of bioluminescence signal is also shown in the graph.

Data information: In panel B immunoblotting was performed once and quantified using ImageJ. In panel C data are presented as mean  $\pm$  SD (pcDNA3, n=7 and pcLINC00313, n=6). n.s.: not significant (Student's t-test).

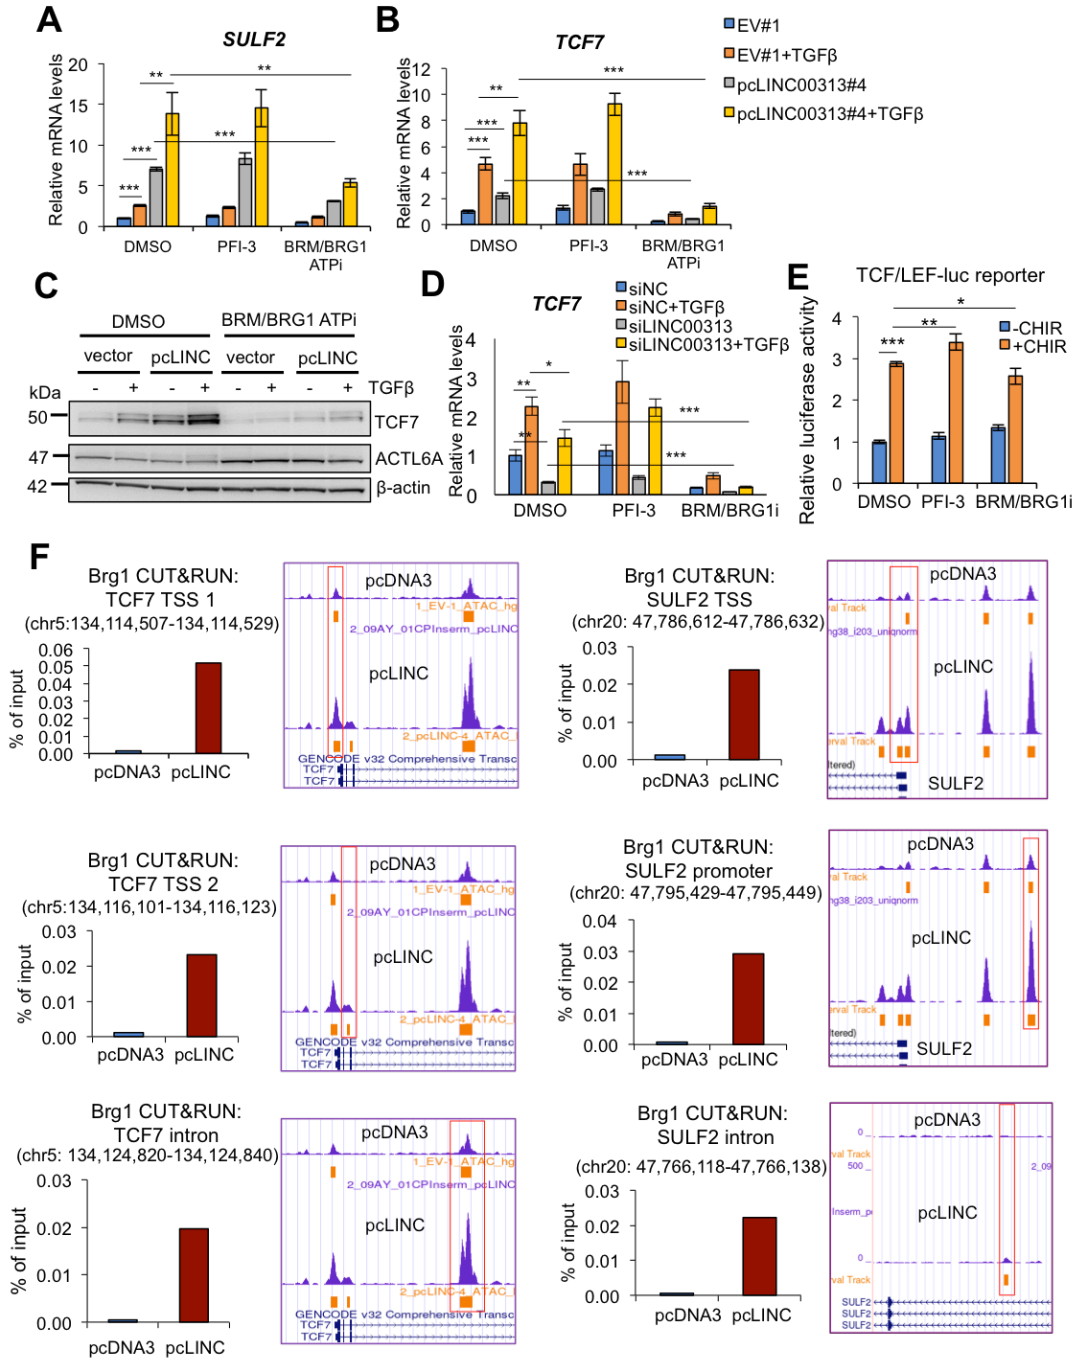

Appendix Figure S8



**Appendix Figure S8. The SWI/SNF complex catalytic subunit BRG1 regulates specific LINC00313-target genes.**

A) qPCR analysis of *SULF2* mRNA in pcDNA3 or *LINC00313* over-expressing HuCCT1 treated with PFI-3 or BRM/BRG ATPi or DMSO and with or without TGF $\beta$ 1. B) qPCR analysis of *TCF7* mRNA in the same conditions as in panel A. Data are presented as mean  $\pm$  SD (n=3 biological replicates). C) Immunoblotting for TCF7, ACTL6A and  $\beta$ -actin protein levels in the same conditions as in panel A.

D) qPCR analysis of *TCF7* mRNA levels in HuCCT1 cells transiently transfected with siRNAs targeting LINC00313 or a non-targeting siRNA (siNC) and treated with PFI-3 or BRM/BRG ATPi or DMSO and in the presence or not of TGF $\beta$ 1. Data are presented as mean  $\pm$  SD (n=3 biological replicates).

E) TCF/LEF luciferase reporter assay in HuCCT1 cells treated with DMSO, PFI-3 or BRM/BRG ATPi and in the presence or not of CHIR99021. Data are presented as mean  $\pm$  SD (n=4 biological replicates).

F) CUT&RUN assays to evaluate Brg1 binding to the specified genomic regions in pcDNA3 or *LINC00313* over-expressing HuCCT1 cells. Experiment was performed in triplicate.

Data information: In panels A, B, D, E data are presented as mean  $\pm$  SD (n=3 biological experiments). \*P $\leq$ 0.05, \*\*P $\leq$ 0.01, \*\*\*P $\leq$ 0.001 (Student's t-test). In panel F (n=1).

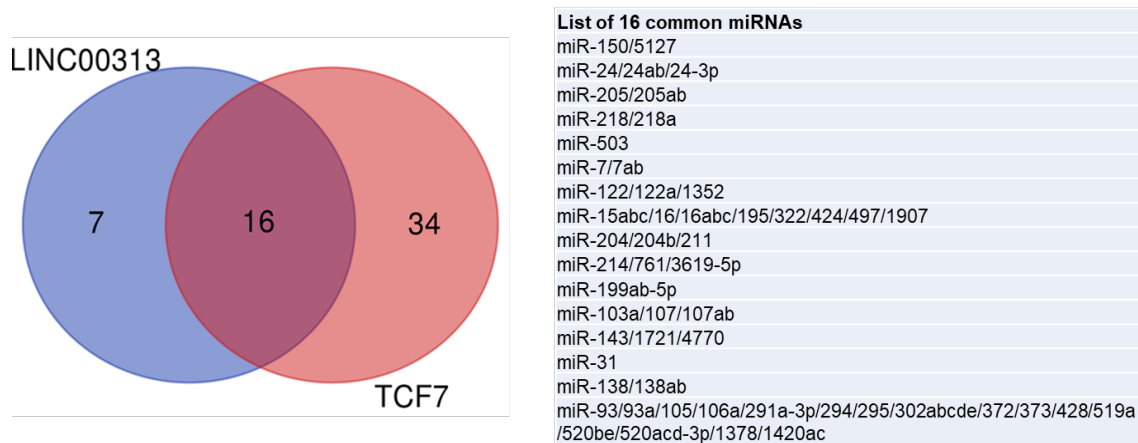

**Appendix Figure S9. Prediction of miRNAs that commonly target LINC00313 and TCF7.**

**Appendix Table S1. List of siRNAs**

| <b>RNAi reagent</b> | <b>Sequence</b>                                                                          | <b>Product ID</b>                                                       |
|---------------------|------------------------------------------------------------------------------------------|-------------------------------------------------------------------------|
| siNC                | UGGUUUACAUGUCGACUAA<br>UGGUUUACAUGUUGUGUGA<br>UGGUUUACAUGUUUUCUGA<br>UGGUUUACAUGUUUCCUA  | ON-TARGETplus Non-targeting Pool, D-001810-10-05, Dharmacon             |
| siLINC00313         | Sense:<br>CGAGAAGCCCGAUGGGAAAUU<br>Antisense:<br>UUUCCCAUCGGGCUUCUCGUU                   | Custom-made individual siRNA, CTM-484556, Dharmacon                     |
| siLINC00313#2       | Sense:<br>CGGGCUUCCUGGAUUGCAUUU<br>Antisense:<br>AUGCAAUCCAGGAAGCCCGUU                   | Custom-made individual siRNA, CTM-632606, Dharmacon                     |
| siSMAD2             | GAAUUGAGCCACAGAGUAA<br>GGUUUACUCUCCAAUGUUA<br>UCAUAAAGCUUCACCAAUC<br>ACUAGAAUGUGCACCAUAA | ON-TARGETplus Human SMAD2 siRNA SMARTpool, L-003561-00-0005, Dharmacon  |
| siSMAD3             | CAACAGGAAUGCAGCAGUG<br>GAGUUCGCCUUCAAUAUGA<br>GGACGCAGGUUCUCCAAAC<br>UUAGAGACAUCAAGUAUGG | ON-TARGETplus Human SMAD3 siRNA SMARTpool, L-0020067-00-0005, Dharmacon |
| siSMAD4             | GCAAUUGAAAGUUUGGUAA<br>CCCACAACCUUUAGACUGA<br>GAAUCCAUAUCACUACGAA<br>GUACAGAGUUACUACUUAG | ON-TARGETplus Human SMAD4 siRNA SMARTpool, L-003902-00-0005, Dharmacon  |
| siACTL6A            | GAACGGAGGUUUAGCUCAU<br>CCUACUACAUAGAUACUAA<br>GUAAAGGGGUUAUCAGGAA<br>UGGGAUAGUUCCAAGCUA  | ON-TARGETplus Human ACTL6A siRNA SMARTpool, L-008243-00-0005, Dharmacon |
| siMAPK11            | GCCUGAGGUUCUGGCAAA<br>CGACGAGCACGUUCAAUUC<br>CCAUAGACCUCCUUGGAAG<br>GCGCCGACCUGAACACAU   | ON-TARGETplus Human MAPK11 siRNA SMARTpool, L-003972-00-0005, Dharmacon |
| siMAPK12            | GAAGCGUGUUACUUACAAA<br>GCGCUAAGGUGGCAUCAAA<br>GCAAGACGCUGUUCAAGGG<br>GGAGACGCCUCUGUGAAGA | ON-TARGETplus Human MAPK12 siRNA SMARTpool, L-003590-00-0005, Dharmacon |
| siMAPK13            | GCUCAAGGCCUUAAGUAC<br>GGAGUGGCAUGAAGCUGUA<br>GGAUUUCACUCAGCUGUUC<br>GCCGUUUGAUGAUCCUUA   | ON-TARGETplus Human MAPK13 siRNA SMARTpool, L-003591-00-0005, Dharmacon |
| siMAPK14            | GGAUUCAAUGAUGUGUAU                                                                       | ON-TARGETplus Human MAPK14                                              |

|  |                                                                   |                                              |
|--|-------------------------------------------------------------------|----------------------------------------------|
|  | UCUCCGAGGUCUAAAGUAU<br>GUAUUCUAGCUGUGAAUGA<br>GUCCAUCAUUCAUGCGAAA | siRNA SMARTpool, L-003512-00-0005, Dharmacon |
|  |                                                                   |                                              |

**Appendix Table S2. List of DNA oligonucleotides (F: forward; R: reverse)**

| RT-qPCR primers         | Sequence                                              |
|-------------------------|-------------------------------------------------------|
| <i>TBP</i>              | F, GAGCTGTGATGTGAAGTTTCC<br>R, TCTGGGTTTGATCATTCTGTAG |
| <i>GAPDH</i>            | F, GACCACAGTCCATGCCATCA<br>R, TCCACCACCCTGTTGCTGTA    |
| <i>LINC00313</i>        | F, GCGGGAAACCTCGATGAACA<br>R, ACATTCTTTCCCATCGGGCT    |
| <i>LINC00313 exon 1</i> | F, CGGGCTTCCTGGATTGCATA<br>R, GCTGCTGACGGTTGTTTTGA    |
| <i>LINC00313 exon 3</i> | F, AACACCCCGGATCGAGAAG<br>R, GAGTGGAAACTGTCACGCAA     |
| <i>LINC00313 exon 4</i> | F, GGAAATGACCGCAGAAGGGAG<br>R, TAGCAGCGCCAAGTTCTTTCT  |
| <i>LINC00313-205</i>    | F, CTTGGAAGCCGAGCATCAGT<br>R, CCTCCTGCCGAATAACGACT    |
| <i>SMAD2</i>            | F, AGACACCAGTTTTGCCTCCA<br>R, GAGGTGGCGTTTCTGGAATA    |

|                            |                                                          |
|----------------------------|----------------------------------------------------------|
| <i>SMAD3</i>               | F, CTAGGGCTGCTCTCCAATGT<br>R, AAGACCTCCCCTCCGATGTA       |
| <i>SMAD4</i>               | F, GCTGCTGGAATTGGTGTGATG<br>R, AGGTGTTTCTTTGATGCTCTGTCT  |
| <i>TCF7</i>                | F, GTACAAAGAGACCGTCTACTCC<br>R, GGCTGTTGAAATGTTCTAGAG    |
| <i>WNT5A</i>               | F, CGCCCAGGTTGTAATTGAAG<br>R, GCATGTGGTCCTGATACAAGT      |
| <i>AXIN2</i>               | F, ATTCGGCCACTGTTCCAGACG<br>R, GACAACCAACTCACTGGCCTG     |
| <i>SULF2</i>               | F, CTGTGGGAAGGCTGGGAAGG<br>R, TGAGAGTGCCTGCTTGCTTTC      |
| <i>ACTL6A</i>              | F, ATGTGTGATATTGACATCAGACCAG<br>R, CGCCAATCCATGAGCTAAACC |
| <i>MALAT1</i>              | F, TGTGTGCCAATGTTTCGTTT<br>R, AGGAGAAAGTGCCATGGTTG       |
| <i>RNU48</i>               | F, AGTGATGATGACCCCAGGTAAGTCTG<br>R, TCAGAGCGCTGCGGTGATG  |
| <i>MAPK11</i>              | F, AAGCACGAGAACGTCATCGG<br>R, TCACCAAGTACACTTCGCTGA      |
| <i>MAPK12</i>              | F, GGGCTGCTGGACGTATTCAC<br>R, TGCCCATGAACGGCATCAC        |
| <i>MAPK13</i>              | F, TACATCCACTCTGCTGGGGT<br>R, GTCACCACGTAGCCAGTCAT       |
| <i>MAPK14</i>              | F, TCAGTCCATCATTTCATGCGAAA<br>R, AACGTCCAACAGACCAATCAC   |
| <b>CUT&amp;RUN primers</b> | <b>Sequence</b>                                          |
| TCF7 TSS 1                 | F, TGATCATTCCCAGGCTTGTC                                  |

|                          |                                                                                    |
|--------------------------|------------------------------------------------------------------------------------|
|                          | R, CATAGCCTTAAAGGGCTCGCT<br>F, GCAAGAGACTTCTGCCTGGAA<br>R, CCGGGTGTGTATGGGAGAAAA   |
| TCF7 TSS 2               |                                                                                    |
| TCF7 intron              | F, ACTTTGGGGGTTTACACGGT<br>R, ACCCAAACCAGCTCAGACAT                                 |
| SULF2 TSS                | F, GCCCGGGAGTAGCATAGAAA<br>R, TAGACAGCACCCCTTGAGT                                  |
| SULF2 promoter           | F, GAGCAGTGTCTTCTGTCCGT<br>R, GGGCAGCGATTCCATCAAGT                                 |
| SULF2 intron             | F, TGGTCCCAAACCTCACAAGC<br>R, ACAGATGTGCGTGTGTCATC                                 |
| <b>smiFISH probes</b>    | <b>Sequence</b>                                                                    |
| <i>LINC00313 probe1</i>  | AAG AGA TGC AGG CCC ATC GTG TGC ACT TAC<br>ACT CGG ACC TCG TCG ACA TGC ATT         |
| <i>LINC00313 probe2</i>  | ACC TTT GCC CTG GCT ATG TAA GGA GAA GTT<br>ACA CTC GGA CCT CGT CGA CAT GCA TT      |
| <i>LINC00313 probe3</i>  | CCT TTA TGC AAT CCA GGA AGC CCG CGT TAC<br>ACT CGG ACC TCG TCG ACA TGC ATT         |
| <i>LINC00313 probe4</i>  | CGC CAT TGC CTT AGC AGC GCC AAG TTT TAC<br>ACT CGG ACC TCG TCG ACA TGC ATT         |
| <i>LINC00313 probe5</i>  | TTC TGG GGC AAT CGC CGC TGT TGG TTT TAC<br>ACT CGG ACC TCG TCG ACA TGC ATT         |
| <i>LINC00313 probe6</i>  | CGG GCA TGA CGT CCT TCC CAG ACA TTT TAC<br>ACT CGG ACC TCG TCG ACA TGC ATT         |
| <i>LINC00313 probe7</i>  | CAT CGG GCT TCT CGA TCC GGG GTG TTT TAC<br>ACT CGG ACC TCG TCG ACA TGC ATT         |
| <i>LINC00313 probe9</i>  | TTC CAG CGC TTC CAC ACT TCA CTC GAT TAC<br>ACT CGG ACC TCG TCG ACA TGC ATT         |
| <i>LINC00313 probe10</i> | CGG TGT TTG TTC ATC GAG GTT TCC CGC TGT<br>TAC ACT CGG ACC TCG TCG ACA TGC ATT     |
| <i>LINC00313 probe11</i> | GAC GGT TGT TTT GAC TTG CTC AGA GTT GTC<br>ATT TAC ACT CGG ACC TCG TCG ACA TGC ATT |
| <i>LINC00313 probe12</i> | CGG TGC ACT CCC TTC TGC GGT CAT TTT TAC<br>ACT CGG ACC TCG TCG ACA TGC ATT         |
| <i>LINC00313 probe13</i> | AGG TTC AGA GTG AGC GCA CTG TGA GTG GAA<br>ATT ACA CTC GGA CCT CGT CGA CAT GCA TT  |
| <i>LINC00313 probe14</i> | TCA CAA AGC AGG ATC TGC AGA AAC ACT CTT<br>TAC ACT CGG ACC TCG TCG ACA TGC ATT     |
| <i>LINC00313 probe15</i> | TTC CCC TCG TGT TTC CTA GCA GAT AGT GTT<br>ACA CTC GGA CCT CGT CGA CAT GCA TT      |

**Appendix Table S3. List of primary antibodies**

| <b>Antibody</b>                                      | <b>Dilution</b>                | <b>Application</b> | <b>Source</b>             | <b>Catalogue number</b> |
|------------------------------------------------------|--------------------------------|--------------------|---------------------------|-------------------------|
| phospho-AKT (Ser473) (D9E)                           | 1:1000                         | WB                 | Cell Signaling Technology | #4060                   |
| AKT (pan) (C67E7)                                    | 1:1000                         | WB                 | Cell Signaling Technology | #4691                   |
| phospho-SAPK/JNK (Thr183/Tyr185) (81E11)             | 1:1000                         | WB                 | Cell Signaling Technology | #4668                   |
| SAPK/JNK                                             | 1:1000                         | WB                 | Cell Signaling Technology | #9252                   |
| phospho-p44/42 MAPK (Erk1/2) (Thr202/Tyr204) (197G2) | 1:1000                         | WB                 | Cell Signaling Technology | #4377                   |
| p44/42 MAPK (Erk1/2) (137F5)                         | 1:1000                         | WB                 | Cell Signaling Technology | #4695                   |
| p38 $\alpha$ MAPK                                    | 1:1000                         | WB                 | Cell Signaling Technology | #9218                   |
| p38 $\beta$ MAPK (C28C2)                             | 1:1000                         | WB                 | Cell Signaling Technology | #2339                   |
| p38 $\gamma$ MAPK                                    | 1:1000                         | WB                 | Cell Signaling Technology | #2307                   |
| p38 $\delta$ MAPK (10A8)                             | 1:1000                         | WB                 | Cell Signaling Technology | #2308                   |
| phospho-p38 MAPK (Thr180/Tyr182) (D3F9)              | 1:1000                         | WB                 | Cell Signaling Technology | #4511                   |
| phospho-MAPKAPK-2 (Thr334) (27B7)                    | 1:1000                         | WB                 | Cell Signaling Technology | #3007                   |
| SMAD2/3 (D7G7)                                       | 1:1000                         | WB                 | Cell Signaling Technology | #8685                   |
| SMAD4 (D3M6U)                                        | 1:1000                         | WB                 | Cell Signaling Technology | #38454                  |
| $\beta$ -catenin (D10A8) XP                          | 1:200 for IF,<br>1:1000 for WB | IF, WB             | Cell Signaling Technology | #8480                   |
| TCF1/TCF7 (C63D9)                                    | 1:1000                         | WB                 | Cell Signaling Technology | #2203                   |
| HuR                                                  | 1:1000                         | WB                 | ThermoFisher Scientific   | 1862775                 |
| HA tag                                               | 1:1000                         | WB                 | Abcam                     | ab9110                  |
| Lamin B1 (D9V6H)                                     | 1:1000                         | WB                 | Cell Signaling Technology | #13435                  |
| 14-3-3                                               | 1:1000                         | WB                 | Abcam                     | ab125032                |

|                       |                                           |                 |                              |         |
|-----------------------|-------------------------------------------|-----------------|------------------------------|---------|
| Brg1 (D1Q7F)          | 1:100 for<br>RIP, 1:50<br>for<br>CUT&RUN  | RIP,<br>CUT&RUN | Cell Signaling<br>Technology | #49360  |
| ACTL6A/BAF53A         | 1: 1000 for<br>WB, 1:50 for<br>RIP and IF | WB, RIP, IF     | Cell Signaling<br>Technology | #76682  |
| $\beta$ -tubulin      | 1:1000                                    | WB              | Abcam                        | ab15568 |
| beta-actin            | 1:1000                                    | WB              | Abcam                        | ab8224  |
| $\beta$ -actin (D6A8) | 1:1000                                    | WB              | Cell Signaling<br>Technology | #8457   |
